# Supplementary material for: Profiles of Protective Factors among Children and Adolescents in the Child Welfare System
Source: Springer Nature journal article supplement (doi:10.1007/s10826-023-02740-8), 2023-12-15

**Table 5.**

*Descriptive statistics and percentages of the 4-class solution*

|  | **Profiles** | **N** | **%** | **F1. Personal Resources** | | **F2. Family Resources** | | **F3. Community Resources** | |
| --- | --- | --- | --- | --- | --- | --- | --- | --- | --- |
|  | **M** | **SD** | **M** | **SD** | **M** | **SD** |
|  | 1 | 81 | 13.1 | 1.31 | 0.05 | 2.11 | 0.30 | 2.53 | 0.22 |
|  | 2 | 207 | 33.6 | 1.97 | 0.05 | 1.87 | 0.30 | 2.14 | 0.22 |
|  | 3 | 199 | 32.3 | 1.17 | 0.05 | 1.44 | 0.30 | 1.51 | 0.22 |
|  | 4 | 129 | 20.9 | 2.77 | 0.05 | 2.13 | 0.30 | 2.57 | 0.22 |
| *Notes*: N=nº of participants, M= Mean, SD= Standard Deviation | | | | | | | | | |

**Figure 2.**

*Estimated means of types of protective factors based on the 4-class solution.*


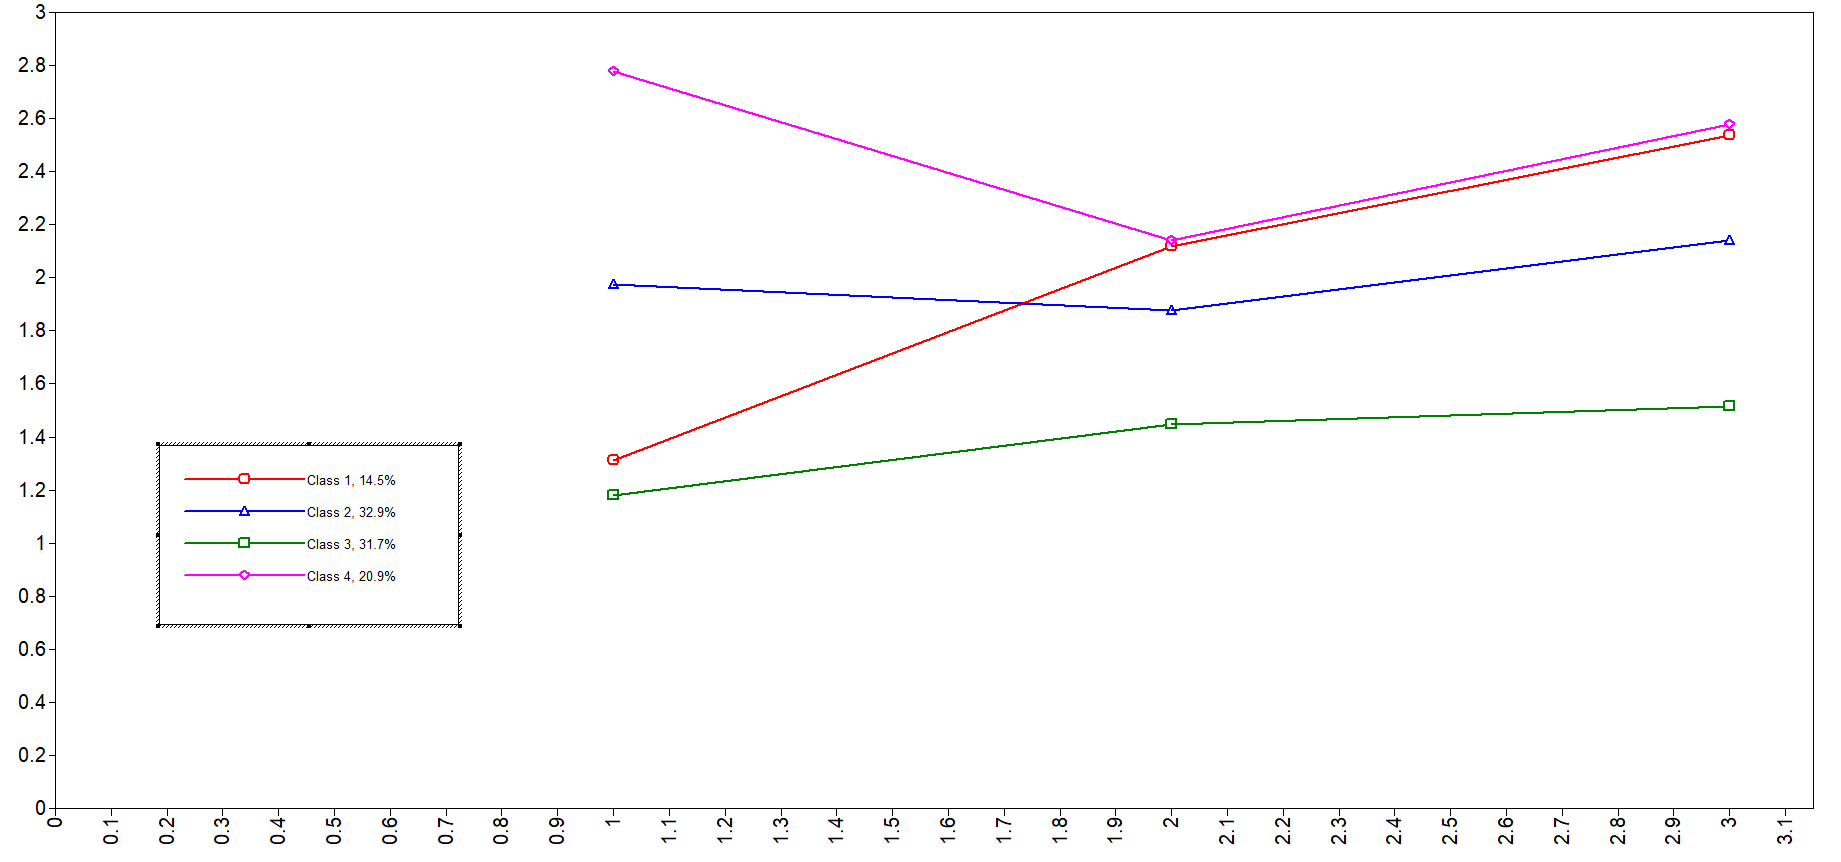

Supplement: MOESM1 [file 26535744]
